# Supplementary material
Source: HighWire-hosted journal article supplement (https://www.cmajopen.ca/highwire/filestream/85476/field_highwire_adjunct_files/2/2020-0181_Original_submission.pdf)
Supplement: 2020-0181_Original_submission.pdf [file 2020-0181_Original_submission.pdf]

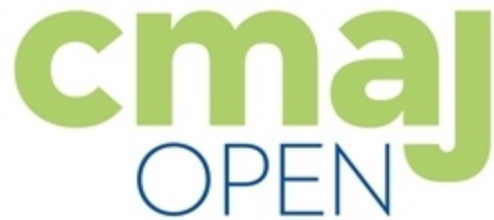

**Prevalence and correlates of cannabis use in pregnancy and while breastfeeding in Hamilton, Ontario following national legalization**

|                               |                                                                                                                                                                                                                                                                                                                                                                                                                                                                                                                                                                                                                                                                                                                                                                                                                                                                                                                                                                                                                                                                                                                                                                                 |
|-------------------------------|---------------------------------------------------------------------------------------------------------------------------------------------------------------------------------------------------------------------------------------------------------------------------------------------------------------------------------------------------------------------------------------------------------------------------------------------------------------------------------------------------------------------------------------------------------------------------------------------------------------------------------------------------------------------------------------------------------------------------------------------------------------------------------------------------------------------------------------------------------------------------------------------------------------------------------------------------------------------------------------------------------------------------------------------------------------------------------------------------------------------------------------------------------------------------------|
| Journal:                      | <i>CMAJ Open</i>                                                                                                                                                                                                                                                                                                                                                                                                                                                                                                                                                                                                                                                                                                                                                                                                                                                                                                                                                                                                                                                                                                                                                                |
| Manuscript ID                 | CMAJOpen-2020-0181                                                                                                                                                                                                                                                                                                                                                                                                                                                                                                                                                                                                                                                                                                                                                                                                                                                                                                                                                                                                                                                                                                                                                              |
| Manuscript Type:              | Cross-sectional                                                                                                                                                                                                                                                                                                                                                                                                                                                                                                                                                                                                                                                                                                                                                                                                                                                                                                                                                                                                                                                                                                                                                                 |
| Date Submitted by the Author: | 29-Jul-2020                                                                                                                                                                                                                                                                                                                                                                                                                                                                                                                                                                                                                                                                                                                                                                                                                                                                                                                                                                                                                                                                                                                                                                     |
| Complete List of Authors:     | Kaarid, Kaija; McMaster University, Department of Obstetrics and Gynecology<br>Vu, Nancy; McMaster University, Department of Obstetrics and Gynecology<br>Bartlett, Katelyn; McMaster University, Department of Obstetrics and Gynecology<br>Patel, Tejal; McMaster University, Department of Obstetrics and Gynecology<br>Sharma, Sapna; McMaster University, Department of Obstetrics and Gynecology<br>Honor, Richard; Queen's University, Department of Biology<br>Shea, Alison; McMaster University, Department of Obstetrics and Gynecology; St. Joseph's Healthcare                                                                                                                                                                                                                                                                                                                                                                                                                                                                                                                                                                                                      |
| Keywords:                     | Obstetrics and gynecology, Reproductive health, Public health, Addiction medicine                                                                                                                                                                                                                                                                                                                                                                                                                                                                                                                                                                                                                                                                                                                                                                                                                                                                                                                                                                                                                                                                                               |
| More Detailed Keywords:       |                                                                                                                                                                                                                                                                                                                                                                                                                                                                                                                                                                                                                                                                                                                                                                                                                                                                                                                                                                                                                                                                                                                                                                                 |
| Abstract:                     | <p>Background: Recreational cannabis use was legalized nationwide in Canada in October 2018. This study aimed to determine the prevalence and correlates of cannabis use among pregnant women in a Canadian city following national legalization.</p> <p>Methods: An anonymous cross-sectional survey was distributed in May-October 2019 to 478 pregnant patients attending family practice, midwifery, low-risk and high-risk obstetrical clinics in Hamilton, Ontario. The survey included questions regarding lifetime and in-pregnancy cannabis use, intent for postpartum use and patterns of use. Demographic information was also collected. Inclusion criteria were English literacy and current pregnancy. Descriptive statistics were calculated, and logistic regression analyses were performed to explore relationships between cannabis use and demographic variables.</p> <p>Results: Among 478 respondents, 11.3% (n=54) had used cannabis at some point in pregnancy and 4.2% (n=20) were currently using. Among those who intended to breastfeed (n=460), 5.0% (n=23) planned to use cannabis postpartum. Of 20 current users, 65% (n=13) reported using</p> |

1  
2  
3  
4  
5  
6  
7  
8  
9  
10  
11  
12  
13  
14  
15  
16  
17  
18  
19  
20  
21  
22  
23  
24  
25  
26  
27  
28  
29  
30  
31  
32  
33  
34  
35  
36  
37  
38  
39  
40  
41  
42  
43  
44  
45  
46  
47  
48  
49  
50  
51  
52  
53  
54  
55  
56  
57  
58  
59  
60

|  |                                                                                                                                                                                                                                                                                                                                                                                                                                                                                                                                                                                                                                                                                                          |
|--|----------------------------------------------------------------------------------------------------------------------------------------------------------------------------------------------------------------------------------------------------------------------------------------------------------------------------------------------------------------------------------------------------------------------------------------------------------------------------------------------------------------------------------------------------------------------------------------------------------------------------------------------------------------------------------------------------------|
|  | <p>at least weekly and 95% (n=19) reported nausea, sleep, or anxiety as reasons for use. Women reporting partner cannabis use had 3.3-fold greater odds of prenatal cannabis use (OR 3.3; 95% CI 1.77-6.17; p&lt;0.001) and women without post-secondary education had 8.6-fold greater odds of prenatal use than university-educated women (OR 8.6; 95% CI 3.78-19.52; p&lt;0.0001).<br/>Interpretation: Partner cannabis use and lower educational attainment predict likelihood of in-pregnancy cannabis use and intent for postpartum use. These results may help inform early intervention strategies to decrease cannabis use during this vulnerable period of fetal and neonatal development.</p> |
|  |                                                                                                                                                                                                                                                                                                                                                                                                                                                                                                                                                                                                                                                                                                          |

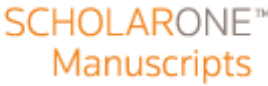

STROBE Statement—Checklist of items that should be included in reports of *cross-sectional studies*

|                              | Item No | Recommendation                                                                                                                                                                                               | Page No |
|------------------------------|---------|--------------------------------------------------------------------------------------------------------------------------------------------------------------------------------------------------------------|---------|
| <b>Title and abstract</b>    | 1       | (a) Indicate the study's design with a commonly used term in the title or the abstract                                                                                                                       | 1, 3    |
|                              |         | (b) Provide in the abstract an informative and balanced summary of what was done and what was found                                                                                                          | 3-4     |
| <b>Introduction</b>          |         |                                                                                                                                                                                                              |         |
| Background/rationale         | 2       | Explain the scientific background and rationale for the investigation being reported                                                                                                                         | 5       |
| Objectives                   | 3       | State specific objectives, including any prespecified hypotheses                                                                                                                                             | 5       |
| <b>Methods</b>               |         |                                                                                                                                                                                                              |         |
| Study design                 | 4       | Present key elements of study design early in the paper                                                                                                                                                      | 6       |
| Setting                      | 5       | Describe the setting, locations, and relevant dates, including periods of recruitment, exposure, follow-up, and data collection                                                                              | 6       |
| Participants                 | 6       | (a) Give the eligibility criteria, and the sources and methods of selection of participants                                                                                                                  | 6       |
| Variables                    | 7       | Clearly define all outcomes, exposures, predictors, potential confounders, and effect modifiers. Give diagnostic criteria, if applicable                                                                     | 6-7     |
| Data sources/<br>measurement | 8*      | For each variable of interest, give sources of data and details of methods of assessment (measurement). Describe comparability of assessment methods if there is more than one group                         | 6       |
| Bias                         | 9       | Describe any efforts to address potential sources of bias                                                                                                                                                    | 7       |
| Study size                   | 10      | Explain how the study size was arrived at                                                                                                                                                                    | 6       |
| Quantitative variables       | 11      | Explain how quantitative variables were handled in the analyses. If applicable, describe which groupings were chosen and why                                                                                 | 7       |
| Statistical methods          | 12      | (a) Describe all statistical methods, including those used to control for confounding                                                                                                                        | 7       |
|                              |         | (b) Describe any methods used to examine subgroups and interactions                                                                                                                                          | 7       |
|                              |         | (c) Explain how missing data were addressed                                                                                                                                                                  | 7       |
|                              |         | (d) If applicable, describe analytical methods taking account of sampling strategy                                                                                                                           | n/a     |
|                              |         | (e) Describe any sensitivity analyses                                                                                                                                                                        | 7       |
| <b>Results</b>               |         |                                                                                                                                                                                                              |         |
| Participants                 | 13*     | (a) Report numbers of individuals at each stage of study—eg numbers potentially eligible, examined for eligibility, confirmed eligible, included in the study, completing follow-up, and analysed            | 8       |
|                              |         | (b) Give reasons for non-participation at each stage                                                                                                                                                         | 8, 21   |
|                              |         | (c) Consider use of a flow diagram                                                                                                                                                                           | 21      |
| Descriptive data             | 14*     | (a) Give characteristics of study participants (eg demographic, clinical, social) and information on exposures and potential confounders                                                                     | 8-9     |
|                              |         | (b) Indicate number of participants with missing data for each variable of interest                                                                                                                          | 18-19   |
| Outcome data                 | 15*     | Report numbers of outcome events or summary measures                                                                                                                                                         | 9-10    |
| Main results                 | 16      | (a) Give unadjusted estimates and, if applicable, confounder-adjusted estimates and their precision (eg, 95% confidence interval). Make clear which confounders were adjusted for and why they were included | 9-10    |

|                          |    |                                                                                                                                                                            |       |
|--------------------------|----|----------------------------------------------------------------------------------------------------------------------------------------------------------------------------|-------|
|                          |    | (b) Report category boundaries when continuous variables were categorized                                                                                                  | 7     |
|                          |    | (c) If relevant, consider translating estimates of relative risk into absolute risk for a meaningful time period                                                           | n/a   |
| Other analyses           | 17 | Report other analyses done—eg analyses of subgroups and interactions, and sensitivity analyses                                                                             | n/a   |
| <b>Discussion</b>        |    |                                                                                                                                                                            |       |
| Key results              | 18 | Summarise key results with reference to study objectives                                                                                                                   | 11    |
| Limitations              | 19 | Discuss limitations of the study, taking into account sources of potential bias or imprecision. Discuss both direction and magnitude of any potential bias                 | 12-13 |
| Interpretation           | 20 | Give a cautious overall interpretation of results considering objectives, limitations, multiplicity of analyses, results from similar studies, and other relevant evidence | 13    |
| Generalisability         | 21 | Discuss the generalisability (external validity) of the study results                                                                                                      | 8     |
| <b>Other information</b> |    |                                                                                                                                                                            |       |
| Funding                  | 22 | Give the source of funding and the role of the funders for the present study and, if applicable, for the original study on which the present article is based              | n/a   |

\*Give information separately for exposed and unexposed groups.

**Note:** An Explanation and Elaboration article discusses each checklist item and gives methodological background and published examples of transparent reporting. The STROBE checklist is best used in conjunction with this article (freely available on the Web sites of PLoS Medicine at <http://www.plosmedicine.org/>, Annals of Internal Medicine at <http://www.annals.org/>, and Epidemiology at <http://www.epidem.com/>). Information on the STROBE Initiative is available at [www.strobe-statement.org](http://www.strobe-statement.org).

1  
2  
3 1 **Prevalence and correlates of cannabis use in pregnancy and while breastfeeding**  
4  
5 2 **in Hamilton, Ontario following national legalization**  
6  
7  
8 3

9  
10 4 **ABSTRACT**  
11

12 5 **Background:** Recreational cannabis use was legalized nationwide in Canada in  
13  
14 6 October 2018. This study aimed to determine the prevalence and correlates of cannabis  
15  
16 7 use among pregnant women in a Canadian city following national legalization.  
17  
18

19 8 **Methods:** From May-October 2019, 478 pregnant patients were recruited from family  
20  
21 9 practice, midwifery, low-risk and high-risk obstetrical clinics in Hamilton, Ontario. The  
22  
23 10 anonymous questionnaire included questions regarding lifetime and in-pregnancy  
24  
25 11 cannabis use, intent for postpartum use and patterns of use. Demographic information  
26  
27 12 was also collected. Inclusion criteria were English literacy and current pregnancy.  
28  
29 13 Descriptive statistics were calculated, and logistic regression analyses were performed  
30  
31 14 to explore relationships between cannabis use and demographic variables.  
32  
33

34  
35 15 **Results:** Among 478 respondents, 11.3% (n=54) had used cannabis at some point in  
36  
37 16 pregnancy and 4.2% (n=20) were currently using. Among those who intended to  
38  
39 17 breastfeed (n=460), 5.0% (n=23) planned to use cannabis postpartum. Of 20 current  
40  
41 18 users, 65% (n=13) reported using at least weekly and 95% (n=19) reported nausea,  
42  
43 19 sleep, or anxiety as reasons for use. Women reporting partner cannabis use had 3.3-  
44  
45 20 fold greater odds of prenatal cannabis use (OR 3.3; 95% CI 1.77-6.17; p<0.001) and  
46  
47 21 women without post-secondary education had 8.6-fold greater odds of prenatal use than  
48  
49 22 university-educated women (OR 8.6; 95% CI 3.78-19.52; p<0.0001).  
50  
51  
52  
53  
54  
55  
56  
57  
58  
59  
60

1  
2  
3  
4  
5  
6  
7  
8  
9  
10  
11  
12  
13  
14  
15  
16  
17  
18  
19  
20  
21  
22  
23  
24  
25  
26  
27  
28  
29  
30  
31  
32  
33  
34  
35  
36  
37  
38  
39  
40  
41  
42  
43  
44  
45  
46  
47  
48  
49  
50  
51  
52  
53  
54  
55  
56  
57  
58  
59  
60

**23 Interpretation:** Partner cannabis use and lower educational attainment predict  
24 likelihood of in-pregnancy cannabis use and intent for postpartum use. These results  
25 may help inform early intervention strategies to decrease cannabis use during this  
26 vulnerable period of fetal and neonatal development.

Confidential

## 46 INTRODUCTION

47 The Cannabis Act, passed in October 2018, legalized recreational cannabis use  
48 nationwide.<sup>1</sup> Prior to legalization, the proportion of Canadian women reporting past-year  
49 cannabis use increased from 6.6% in 2004 to 11.1% in 2017.<sup>2</sup> Following legalization,  
50 women's rates of use during the previous 3 months rose from 11.1% in the fourth  
51 quarter of 2018 to 14.0% in the third quarter of 2019.<sup>3,4</sup> Further, rates of antenatal  
52 cannabis use are also rising.<sup>5,6,7</sup> For example, an Ontario study revealed that 1.2% of  
53 pregnant women used cannabis in 2012 compared to 1.8% in 2017.<sup>8</sup> Trends in  
54 antenatal cannabis use post-legalization have not been reported.

56 Although the literature is heterogenous,<sup>9</sup> several studies have found associations  
57 between prenatal cannabis use and adverse outcomes such as low birth weight,  
58 preterm delivery, placental abruption and admission to the neonatal intensive care  
59 unit.<sup>10-13</sup> Multiple organizations advise against the use of cannabis in pregnancy and  
60 breastfeeding, including the Society of Obstetricians and Gynecologists of Canada  
61 (SOGC)<sup>14</sup> and the American College of Obstetricians & Gynecologists (ACOG).<sup>15</sup>  
62 Awareness of prevalence and correlates of in-pregnancy cannabis use would facilitate  
63 appropriate screening and counselling practices. Our study aims were to: estimate the  
64 prevalence of in-pregnancy cannabis use; identify demographic correlates of prenatal  
65 cannabis use; and characterize patterns of prenatal cannabis use, including frequency,  
66 methods, and reasons for use.

67

68

## 69 **METHODS**

### 70 **Questionnaire Design**

71 An anonymous 15-item questionnaire was developed with questions pertaining to  
72 lifetime and in-pregnancy cannabis use as well as demographic data (age, education,  
73 annual household income and relationship status). Four additional items were added if  
74 the participant answered “yes” to current use of cannabis in pregnancy, which assessed  
75 reasons for use, frequency of use and methods of use (Appendix S1). The  
76 questionnaire was developed using the REDCap secure web-based application and  
77 was pilot tested internally before administration. The study participants accessed the  
78 questionnaire through the McMaster REDCap web portal, which was not password  
79 protected. However, the questionnaire was not advertised or posted on any external  
80 websites and was not considered to be an “open survey”. Data stored on the REDCap  
81 database is password protected, only available to one of the investigators (AS). No  
82 personal or identifying information was collected or stored.

83

### 84 **Setting and Data Collection**

85 Data collection was conducted from May to October 2019 via electronic tablet.  
86 Researchers attended in-person at antenatal clinics in Hamilton, Ontario with care  
87 models of family practice, midwifery, low-risk and high-risk obstetrics. The inclusion  
88 criteria were current pregnancy and English literacy. Post-partum patients and non-  
89 English speakers were excluded. Participants gave informed consent electronically on  
90 the tablet without providing any identifying information, which was followed by the  
91 questionnaire.



## 92 **Statistical Analysis**

93 Highest educational attainment was separated into 3 categories, thought to be most  
94 indicative of cumulative years of formal education: high school or less, college/trade  
95 school and university/graduate school. Annual household income (CA\$) was stratified  
96 into 3 categories: <\$40 000, \$41 000 - \$100 000, >\$100 000. Income categories were  
97 based on tax bracket quintiles in Ontario. The two upper and lower quintiles were  
98 pooled, however, due to small sample sizes in both the highest and lowest tax  
99 quintiles. Educational attainment was used as the indicator of socioeconomic status in  
100 analyses, given that educational attainment and income were highly correlated  
101 ( $p < 0.00001$ ).

102

103 All analyses were performed on R software.<sup>16</sup> Using backward model selection, logistic  
104 regressions were used to evaluate possible relationships between variables relating to  
105 participant cannabis use (i.e. use at some point in pregnancy, current use, and intent to  
106 use while breastfeeding) and demographic variables (i.e. education, relationship status,  
107 partner cannabis use, and age). Overdispersion was not found in any of the models.

108 Following model selection, planned orthogonal contrasts were used to compare groups  
109 within a categorical predictor; therefore, no post-hoc adjustments were needed.<sup>17,18</sup>

110

## 111 **Ethics Approval**

112 The study protocol (#7131) was reviewed and approved by the Hamilton Integrated  
113 Research Ethics Board on May 6, 2019.

114

## 115 RESULTS

### 116 Study Population

117 The response rate was 90.0% among women asked to participate in our study  
118 (n=478/531) (Fig. 1). The final study sample, comprising 478 respondents, represented  
119 women from a range of backgrounds regarding educational attainment, household  
120 income and partner cannabis use (Table 1). Regarding relationship status, however, the  
121 vast majority of respondents, 91.6% (n=437/477), were married/common law/living with  
122 a partner; only 8.4% (n=40/477) were single/dating.

123  
124 Overall, our study sample was representative of urban Canadian women. The 2016  
125 Canadian census demonstrated that 74.3% of women aged 25 to 34 had completed  
126 either university, college, or an apprenticeship program, similar to the 81.2%  
127 (n=388/478) of women in our sample.<sup>19</sup> Regarding household income, Hamilton is  
128 similar to other urban communities. The median annual household income in Hamilton  
129 is \$75 464, compared to \$78 373 in Toronto, \$72 662 in Vancouver and \$70 336 in  
130 Canada generally.<sup>20</sup> Finally, the age distribution of pregnant women in our study was  
131 similar to that of pregnant Ontarians in 2016-2017 (Fig. S1).<sup>21</sup>

132  
133 The median age of our sample was 33 years (19 to 44 years), though only 40.0%  
134 (n=191/478) of respondents reported their age. The survey required manual input of  
135 age, while all other questions were multiple-choice; this may explain the missing age  
136 information. To test whether the subset of our sample with age information was  
137 representative of our total study sample, we looked for differences between individuals

1  
2  
3 138 who reported their age compared to those who did not. This was done across all  
4  
5 139 categorical predictors and dependent variables using the Chi-squared test of  
6  
7 140 independence. We found no significant differences (all  $p > 0.20$ ;  $\alpha_{adj} = 0.007$ ). This  
8  
9 141 suggests that, although a significant proportion of surveys had missing age information,  
10  
11 142 data relating to respondents who reported their age were representative of our total  
12  
13 143 study sample.  
14  
15  
16  
17  
18

### 19 145 **Descriptive Findings**

20  
21 146 During pregnancy, 11.3% ( $n = 54/478$ ) of women had used cannabis at some point in  
22  
23 147 time, including before knowing they were pregnant, and 4.2% ( $n = 20/476$ ) were currently  
24  
25 148 using cannabis. Among 96.2% ( $n = 460/478$ ) who planned to breastfeed, 5.0%  
26  
27 149 ( $n = 23/460$ ) intended to use cannabis during that time. Of the 20 individuals reporting  
28  
29 150 current cannabis use, 9 planned to use while breastfeeding, 8 did not plan to use while  
30  
31 151 breastfeeding and 3 did not intend to breastfeed. Partner cannabis use was reported by  
32  
33 152 37.4% ( $n = 178/476$ ) of respondents. Within this subset, 22.6% ( $n = 40/177$ ) of women  
34  
35 153 reported that their partner had used cannabis around them during the pregnancy.  
36  
37  
38  
39

40 154  
41  
42 155 Among those reporting current cannabis use, 65% ( $n = 13/20$ ) used at least weekly. The  
43  
44 156 most common reasons were nausea/vomiting, sleep and nerves/anxiety, with one or  
45  
46 157 more of these being reported by 95% ( $n = 19/20$ ) of current users. Only one individual  
47  
48 158 reported social use as her sole reason for use. Regarding methods of use, 95%  
49  
50 159 ( $n = 19/20$ ) reported smoking cannabis in joint-form. Most users ( $n = 17/20$ ) consumed  
51  
52  
53  
54  
55  
56  
57  
58  
59  
60

1  
2  
3 160 tetrahydrocannabinol (THC)-containing products and none used cannabidiol (CBD)-only  
4  
5 161 products; the remainder (n=3/20) were unsure which type of cannabis they used.  
6  
7

8 162

### 9 10 163 **Correlates of Cannabis Use**

11  
12 164 We analyzed the effects of age, education, partner cannabis use and relationship status  
13  
14 165 on cannabis use at some point in pregnancy, current cannabis use, and intent to use  
15  
16 166 cannabis while breastfeeding. Partner cannabis use and education were significant  
17  
18 167 predictors of cannabis use at some point in pregnancy and intent to use cannabis while  
19  
20 168 breastfeeding (Table 2). Individuals with an elementary or high school education had  
21  
22 169 8.6-fold greater odds (OR 8.6; 95% CI 3.8-19.5) of using cannabis in pregnancy than  
23  
24 170 individuals who attended university/graduate school. Compared to individuals whose  
25  
26 171 partners did not use cannabis, individuals who reported partner cannabis use had 3.3-  
27  
28 172 fold greater odds (OR 3.3; 95% CI 1.8-6.2) of using cannabis in pregnancy. The effects  
29  
30 173 of education and partner cannabis use were found to be additive (Fig. 2). Education was  
31  
32 174 the only significant predictor for current cannabis use.  
33  
34  
35  
36  
37

38 175

39  
40 176 Partner cannabis use was not a significant predictor of current cannabis use and  
41  
42 177 relationship status was not a significant predictor in any of the three models. Although  
43  
44 178 trends suggested that these factors may be correlated with cannabis use, sample sizes  
45  
46 179 of current cannabis users and those who were single/dating may have been too low to  
47  
48 180 detect an effect (Table 1). We found no relationship between age and cannabis use in  
49  
50 181 any of the predictive models.  
51  
52

53  
54 182

## 183 INTERPRETATION

184 Our survey found that 11.3% (n=54/478) of women had used cannabis at some point in  
185 pregnancy and 4.2% (n=20/476) were currently using cannabis. Lower educational  
186 attainment and partner cannabis use were found to be significant predictors of cannabis  
187 use in pregnancy and intent to use while breastfeeding, but age was not. Regarding  
188 relationship status, a greater proportion of single/dating women used cannabis in  
189 pregnancy and intended to use while breastfeeding when compared to women who  
190 were married/common law/living with a partner, but the effect was not significant.

191  
192 Lower educational attainment as a predictor of prenatal cannabis use corroborates  
193 previous findings associating lower socioeconomic status with cannabis consumption  
194 during pregnancy.<sup>5,6,8,22</sup> Data from the Better Outcomes Registry and Network in Ontario  
195 revealed that 54.7% of pregnant cannabis users were in the lowest two income  
196 quintiles.<sup>8</sup> In our study, 30% (n=27/90) of women who had completed only high school  
197 or elementary school used cannabis at some point in pregnancy, compared to only  
198 4.1% (n=9/218) of university-educated women (Table 1).

199  
200 Partner cannabis use was also found to predict maternal cannabis use in pregnancy.  
201 Several studies have found that pregnant women are less likely to discontinue  
202 substance use if their partners currently use.<sup>23-25</sup> We found that individuals whose  
203 partners smoked cannabis had 3.3 times greater odds of using cannabis during  
204 pregnancy than women whose partners did not smoke. Beyond increasing the likelihood  
205 of maternal cannabis use, partner cannabis use could also cause direct harm. Among

1  
2  
3 206 37.4% (n=178/476) of respondents who reported partner cannabis use in our study,  
4  
5 207 22.6% (n=40/177) reported that their partner smoked cannabis around them. Given  
6  
7  
8 208 known risks of maternal second-hand tobacco smoke exposure to the developing  
9  
10 209 fetus,<sup>26,27</sup> second-hand exposure to cannabis smoke and THC are cause for concern.

11  
12 210  
13  
14 211 Regarding frequency of use, 65% (n=13/20) of pregnant cannabis users consumed  
15  
16  
17 212 cannabis at least weekly. Antenatal cannabis use at least once per week has been  
18  
19 213 associated with low birth weight in exposed neonates.<sup>9</sup> The most common reasons for  
20  
21 214 use in our study were nausea/vomiting, sleep and nerves/anxiety, with one or more of  
22  
23  
24 215 these being reported by 95% (n=19/20) of current cannabis users. Nausea has  
25  
26 216 previously been reported as a common reason for cannabis use in pregnancy.<sup>28</sup>

27  
28 217  
29  
30 218 Our study reported the prevalence of cannabis use among pregnant women in an urban  
31  
32  
33 219 centre and identified important correlates of antenatal cannabis use. Large-scale  
34  
35 220 studies will be needed over time to identify trends in antenatal cannabis use following  
36  
37  
38 221 national legalization. Also, further inquiry into pregnant women's perceptions and  
39  
40 222 reasons for cannabis use could help improve health counseling and outcomes.

41  
42 223

#### 43 44 224 **Limitations**

45  
46  
47 225 The survey did not include questions about participants' ethnicity or use of other  
48  
49 226 substances, which have previously been noted to influence prenatal cannabis  
50  
51 227 use.<sup>5,6,8,22,29,30</sup> Also, women who were non-fluent or non-literate in English were  
52  
53  
54 228 excluded from this study because the survey was written in English, which may have led

1  
2  
3 229 to selection bias. Finally, the small numbers of current cannabis users (n=20) and  
4  
5 230 individuals who were single/dating (n=40) may have reduced the power of analyses  
6  
7  
8 231 involving these variables.  
9

10 232

## 11 233 **Conclusion**

12  
13  
14 234 Our results have important implications for clinical practice, especially given the  
15  
16  
17 235 expanding legalization and decriminalization of cannabis internationally. Given that  
18  
19 236 partner cannabis use predisposes pregnant women to use cannabis while pregnant,  
20  
21 237 including partners in discussions about cannabis risks in pregnancy could reduce  
22  
23  
24 238 prenatal cannabis consumption and potential harm to the fetus. In our study, a greater  
25  
26 239 proportion of women intended to use cannabis while breastfeeding than used cannabis  
27  
28 240 in pregnancy, highlighting the need to counsel abstinence from cannabis not only during  
29  
30  
31 241 pregnancy but also while breastfeeding. Finally, awareness of patterns of cannabis use  
32  
33 242 and reasons for use might aid healthcare providers in more focused counseling.  
34  
35 243 Proposing evidence-based, safer alternatives for coping with bothersome symptoms,  
36  
37  
38 244 including nausea, sleep issues and anxiety, may reduce rates of cannabis use in  
39  
40 245 pregnancy.  
41

42 246

## 43 247 **REFERENCES**

- 44  
45  
46  
47 248 1. Government of Canada. The legalization and regulation of cannabis. Ottawa  
48  
49 249 (ON): Government of Canada; 2018.  
50  
51  
52  
53  
54  
55  
56  
57  
58  
59  
60

- 1  
2  
3 250 2. Rotermann M. Analysis of trends in the prevalence of cannabis use and  
4  
5 251 related metrics in Canada. Catalogue no. 82-003-X. Ottawa (ON):  
6  
7 252 Government of Canada; 2019.  
8  
9
- 10 253 3. Statistics Canada. National Cannabis Survey, fourth quarter 2018. Ottawa  
11  
12 254 (ON): Statistics Canada; 2019.  
13
- 14 255 4. Statistics Canada. National Cannabis Survey, third quarter 2019. Ottawa  
15  
16 256 (ON): Statistics Canada; 2019.  
17  
18
- 19 257 5. Brown QL, Sarvet AL, Shmulewitz D, Martins SS, Wall MM, Hasin DS. Trends  
20  
21 258 in marijuana use among pregnant and nonpregnant reproductive-aged  
22  
23 259 women, 2002-2014. *JAMA* 2017;317(2):207-9.  
24  
25
- 26 260 6. Ko JY, Farr SL, Tong VT, Creanga AA, Callaghan WM. Prevalence and  
27  
28 261 patterns of marijuana use among pregnant and nonpregnant women of  
29  
30 262 reproductive age. *Am J Obstet Gynecol* 2015;213(2):201.e1-10.  
31  
32
- 33 263 7. Young-Wolff KC, Sarovar V, Tucker LY, Conway A, Alexeeff S, Weisner C, et  
34  
35 264 al. Self-reported daily, weekly, and monthly cannabis use among women  
36  
37 265 before and during pregnancy. *JAMA Netw Open* 2019;2(7):e196471.  
38  
39
- 40 266 8. Corsi DJ, Hsu H, Weiss D, Fell DB, Walker M. Trends and correlates of  
41  
42 267 cannabis use in pregnancy: A population-based study in Ontario, Canada  
43  
44 268 from 2012 to 2017. *C J Public Health* 2019;110:76-84.  
45  
46
- 47 269 9. Conner SN, Bedell V, Lipsey K, Macones GA, Cahill AG, Tuuli MG. Maternal  
48  
49 270 marijuana use and adverse neonatal outcomes: A systematic review and  
50  
51 271 meta-analysis. *Obstet Gynecol.* 2016;128(4):713-23.  
52  
53  
54  
55  
56  
57  
58  
59  
60



- 1  
2  
3 272 10. Corsi DJ, Walsh L, Weiss D, Hsu H, El-Chaar D, Hawken S, et al. Association  
4  
5 273 between self-reported prenatal cannabis use and maternal, perinatal, and  
6  
7 274 neonatal outcomes. *JAMA* 2019;322(2):145-52.  
8  
9  
10 275 11. Petrangelo A, Czuzoj-Shulman N, Abenhaim HA. Obstetrical and neonatal  
11  
12 276 outcomes in pregnancies affected by cannabis abuse or dependence. *Obstet*  
13  
14 277 *Gynecol* 2018;131:62-70.  
15  
16  
17 278 12. Gunn JK, Rosales CB, Center KE, Nuñez A, Gibson SJ, Christ C, et al.  
18  
19 279 Prenatal exposure to cannabis and maternal and child health outcomes: A  
20  
21 280 systematic review and meta-analysis. *BMJ Open* 2016;6(4):e009986.  
22  
23  
24 281 13. Mark K, Desai A, Terplan M. Birth outcomes associated with cannabis use  
25  
26 282 before and during pregnancy. *Arch Womens Ment Health* 2016;19(1):105-11.  
27  
28  
29 283 14. Ordean A, Wong S, Graves L. Substance Use in Pregnancy. *J Obstet*  
30  
31 284 *Gynaecol Can* 2017;39(10):922-937.e2.  
32  
33 285 15. Committee on Obstetric Practice. Committee Opinion No. 722: Marijuana use  
34  
35 286 during pregnancy and lactation. *American College of Obstetricians and*  
36  
37 287 *Gynecologists*; 2017.  
38  
39  
40 288 16. R Core Team. R: A language and environment for statistical computing. R  
41  
42 289 Foundation for Statistical Computing. Version 3.4 [software]. 2013 [cited 2020  
43  
44 290 Mar 21]. Available from: <http://www.R-project.org/>.  
45  
46  
47 291 17. Seltman HJ. Contrasts and custom hypotheses. In: *Experimental design and*  
48  
49 292 *analysis* [Internet]. 2015 [cited 2020 Mar 21]. Available from:  
50  
51 293 <http://www.stat.cmu.edu/~hseltman/309/Book>.  
52  
53  
54  
55  
56  
57  
58  
59  
60

- 1  
2  
3 294 18. Crawley MJ. Contrasts. In: Statistics: An introduction using R. 2nd ed. New  
4  
5 295 York: Wiley; 2015. p. 212-225.  
6  
7 296 19. Statistics Canada. Education Highlight Tables, 2016 Census. Ottawa (ON):  
8  
9 Statistics Canada; 2019.  
10 297  
11  
12 298 20. Statistics Canada. Income Highlight Tables, 2016 Census. Ottawa (ON):  
13  
14 299 Statistics Canada; 2019.  
15  
16 300 21. One in a Million. BORN Ontario Biennial Report: 2016-2018. Ottawa (ON):  
17  
18 BORN Ontario; 2018.  
19 301  
20  
21 302 22. Crume TL, Juhl AL, Brooks-Russell A, Hall KE, Wymore E, Borgelt LM.  
22  
23 Cannabis use during the perinatal period in a state with legalized recreational  
24 303 and medical marijuana: The association between maternal characteristics,  
25 304 and medical marijuana: The association between maternal characteristics,  
26 305 breastfeeding patterns, and neonatal outcomes. J Pediatr 2018;197:90-6.  
27  
28 306 23. Roman-Galvez RM, Amezcua-Prieto C, Olmedo-Requena R, Lewis-Mikhael  
29  
30 Saad AM, Martinez-Galiano JM, Bueno-Cavanillas A. Partner smoking  
31 307 influences whether mothers quit smoking during pregnancy: a prospective  
32 308 cohort study. BJOG 2018;125:820-7.  
33  
34 309 24. Fitzpatrick KE, Gray R, Quigley MA. Women's longitudinal patterns of  
35  
36 310 smoking during the pre-conception, pregnancy and postnatal period:  
37 311 Evidence from the UK Infant Feeding Survey. PLoS ONE 2016;11:e0153447.  
38  
39 312 25. Perreira KM, Cortes KE. Race/Ethnicity and Nativity Differences in Alcohol  
40  
41 313 and Tobacco Use During Pregnancy. Am J Public Health 2006;96:1629-36.  
42  
43 314  
44  
45  
46  
47  
48  
49  
50  
51  
52  
53  
54  
55  
56  
57  
58  
59  
60

- 1  
2  
3 315 26. Simons E, To T, Moineddin R, Stieb D, Dell SD. Maternal second-hand  
4  
5 316 smoke exposure in pregnancy is associated with childhood asthma  
6  
7 317 development. *J Allergy Clin Immunol Pract* 2014;2:201-7.  
8  
9  
10 318 27. Evlampidou I, Bagkeris M, Vardavas C, Koutra K, Patelarou E, Koutis A, et al.  
11  
12 319 Prenatal second-hand smoke exposure measured with urine cotinine may  
13  
14 320 reduce gross motor development at 18 months of age. *J Pediatr*  
15  
16 321 2015;167:246-52.  
17  
18  
19 322 28. Young-Wolff KC, Sarovar V, Tucker LY, Avalos LA, Alexeeff S, Conway A, et  
20  
21 323 al. Trends in marijuana use among pregnant women with and without nausea  
22  
23 324 and vomiting in pregnancy, 2009-2016. *Drug Alcohol Depend* 2019;196:66-  
24  
25 325 70.  
26  
27  
28 326 29. Petrangelo A, Czuzoj-Shulman N, Balayla J, Abenhaim HA. Cannabis abuse  
29  
30 327 or dependence during pregnancy: A population-based cohort study on 12  
31  
32 328 million births. *J Obstet Gynaecol Can* 2019;41:623-30.  
33  
34  
35 329 30. El Marroun H, Tiemeier H, Jaddoe VW, Hofman A, Mackenbach JP, Steegers  
36  
37 330 EA, et al. Demographic, emotional and social determinants of cannabis use in  
38  
39 331 early pregnancy: The Generation R study. *Drug Alcohol Depend*  
40  
41 332 2008;98:218-26.  
42  
43  
44 333  
45  
46 334  
47  
48 335  
49  
50 336  
51  
52 337  
53  
54  
55  
56  
57  
58  
59  
60

338

339

340

341

342

343

344

345 **Table 1.** Summary of sample cohort and outcomes.

| Variable                     | All Women       | Cannabis at Some Point in Pregnancy | Current Cannabis Use During Pregnancy | Intent to Use Cannabis While Breastfeeding* |
|------------------------------|-----------------|-------------------------------------|---------------------------------------|---------------------------------------------|
| <b>All Women</b>             | 100 (478)       | 11.3% (54/478)                      | 4.2% (20/478)                         | 5% (23/460)                                 |
| <b>Education</b>             |                 |                                     |                                       |                                             |
| Elementary/High School       | 18.8% (90/478)  | 30% (27/90)                         | 16% (14/90)                           | 14% (12/83)                                 |
| College/Trade School         | 35.6% (170/478) | 10.6% (18/170)                      | 2.4% (4/170)                          | 3.7% (6/164)                                |
| University/Graduate School   | 45.6% (218/478) | 4.1% (9/218)                        | 0.9% (2/218)                          | 2.3% (5/213)                                |
| <b>Income (CA\$)</b>         |                 |                                     |                                       |                                             |
| \$0-40,000                   | 19.7% (94/478)  | 27% (25/94)                         | 15% (14/94)                           | 9% (8/88)                                   |
| \$41,000-100,000             | 36.8% (176/478) | 7.2% (15/208)                       | 1.0% (2/208)                          | 3.5% (7/198)                                |
| \$101,000+                   | 43.5% (208/478) | 7.9% (14/176)                       | 2.3% (4/176)                          | 4.6% (8/174)                                |
| <b>Partner Cannabis Use†</b> |                 |                                     |                                       |                                             |

|    |                                        |                 |                |               |                          |
|----|----------------------------------------|-----------------|----------------|---------------|--------------------------|
| 1  |                                        |                 |                |               |                          |
| 2  |                                        |                 |                |               |                          |
| 3  |                                        |                 |                |               |                          |
| 4  | Yes                                    | 37.4% (178/476) | 20.2% (36/178) | 7.3% (13/178) | 8.9% (15/169)            |
| 5  |                                        |                 |                |               |                          |
| 6  | No                                     | 62.6% (298/476) | 6.0% (18/298)  | 2.3% (7/298)  | 2.8% (8/289)             |
| 7  |                                        |                 |                |               |                          |
| 8  | <b>Relationship Status<sup>†</sup></b> |                 |                |               |                          |
| 9  |                                        |                 |                |               |                          |
| 10 | Single/Dating                          | 8.4% (40/477)   | 18% (7/40)     | 10% (4/40)    | 9% (3/34)                |
| 11 |                                        |                 |                |               |                          |
| 12 |                                        |                 |                |               |                          |
| 13 | Married/Living Together                | 91.6% (437/477) | 10.8% (47/437) | 3.7% (16/437) | 4.7% (20/425)            |
| 14 |                                        |                 |                |               |                          |
| 15 | <b>Age<sup>§</sup> (years)</b>         | 32.3 ± 4.6      | 30.4 ± 6.0     | 31.1 ± 4.2    | 30.5 ± 5.3 <sup>  </sup> |
| 16 |                                        |                 |                |               |                          |

17 346

18 347 Data are % (n) or mean ± SD.

19 348 Percentages represent the proportion of women with the outcome for a given level of a  
 20 349 categorical variable (e.g. 30% of women with a high school education, n=27/90, used  
 21 350 cannabis during pregnancy).

22 351 Means represent the mean age of women with the outcome (e.g. the mean age of  
 23 352 women that smoked cannabis during pregnancy was 30.4± 6.0).

24 353 \*Statistics in this column are calculated from the subset of respondents who intended to  
 25 354 breastfeed (those who did not intend to breastfeed were excluded from calculations).

26 355 † Two observations removed due to missingness.

27 356 ‡ One observation removed due to missingness.

28 357 §Statistics are calculated from the n=191 participants who reported their age.

29 358 ||Statistics are calculated from the n=185 participants who reported their age and  
 30 359 intended to breastfeed.

31 360

32 361

33 362

34 363

35

36

37

38

39

40

1  
2  
3 364  
4  
5 365  
6  
7  
8 366  
9  
10 367  
11  
12 368  
13  
14  
15 369  
16  
17 370  
18 371  
19 372

**Table 2.** Logistic regression model results.

| Characteristic               | Cannabis Use at Some Point in Pregnancy | Current Cannabis Use During Pregnancy | Intent to Use Cannabis While Breastfeeding |
|------------------------------|-----------------------------------------|---------------------------------------|--------------------------------------------|
|                              | OR (95% CI)                             | OR (95% CI)                           | OR (95% CI)                                |
| <b>Education</b>             |                                         |                                       |                                            |
| Elementary/High School       | 8.6 (3.8- 19.5)                         | 19.9 (4.4-89.5)                       | 5.9 (2.0-17.7)                             |
| College/Trade School         | 2.5 (1.1-5.8)                           | 2.6 (0.47-14.4)                       | 1.43 (0.4-4.8)                             |
| University/Graduate School   | Ref.                                    | Ref.                                  | Ref.                                       |
| <b>Partner Cannabis Use†</b> |                                         |                                       |                                            |
| Yes                          | 3.30 (1.8-6.2)                          | NS                                    | 2.8 (1.1-6.9)                              |
| No                           | Ref.                                    | NS                                    | Ref.                                       |

373 OR, odds ratio; CI, confidence interval; Ref., reference value; NS, not significant.

374 †Two observations removed due to missingness.

375  
376  
377  
378

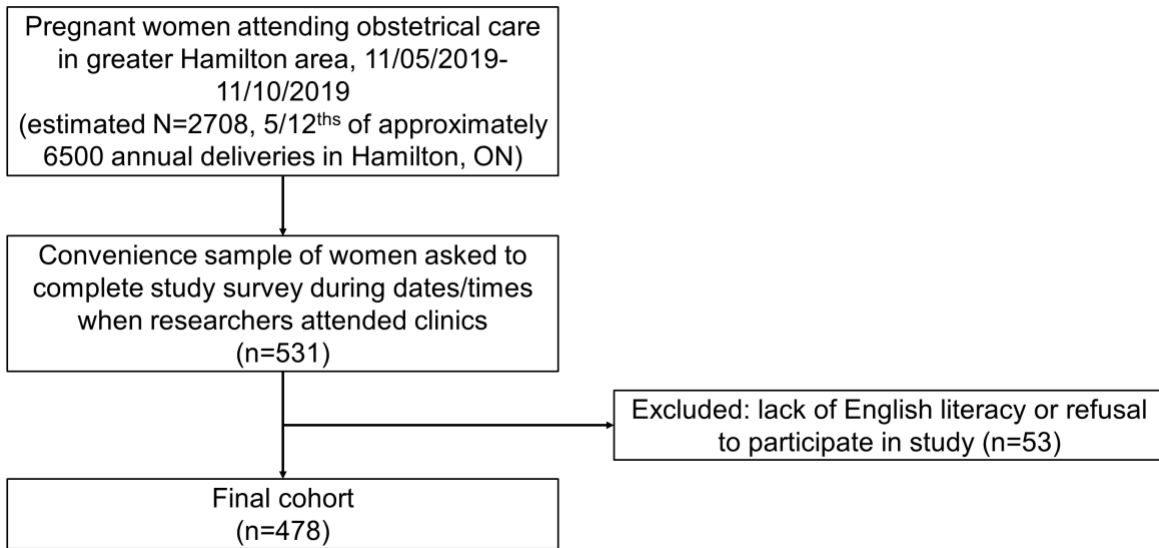

**Figure 1.** Description of participant accrual.

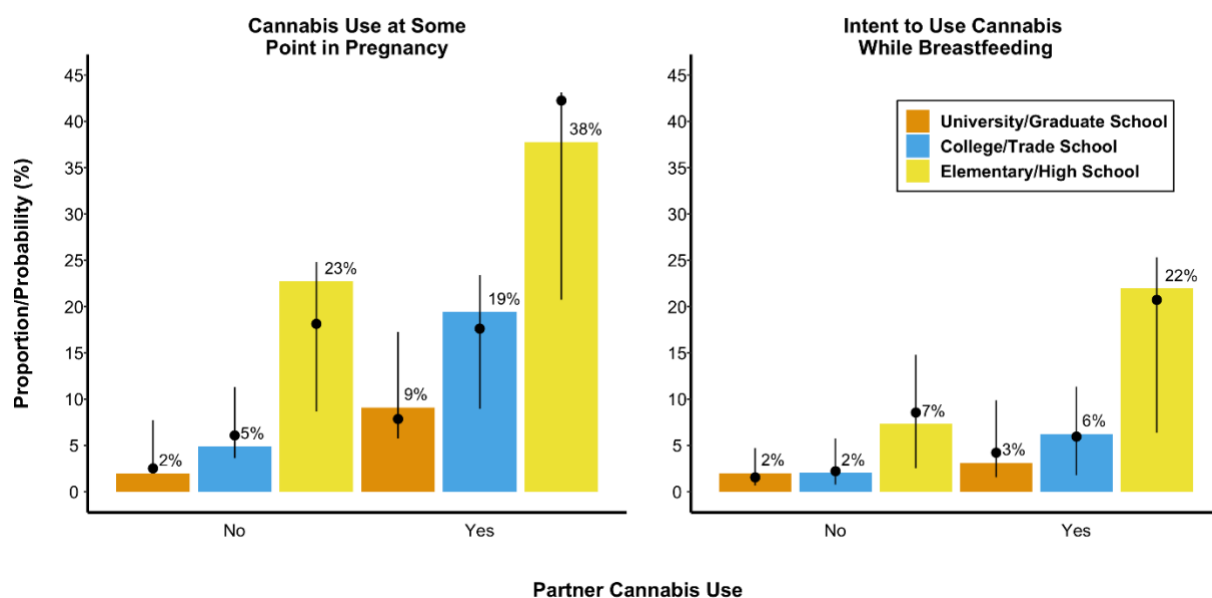

**Figure 2.** Predictors of cannabis use at some point in pregnancy and intent to use cannabis while breastfeeding. For each group of women, coloured bars represent the proportion of women who reported the outcome and dots represent the estimated probability of the outcome ( $\pm 95\%$  CI).



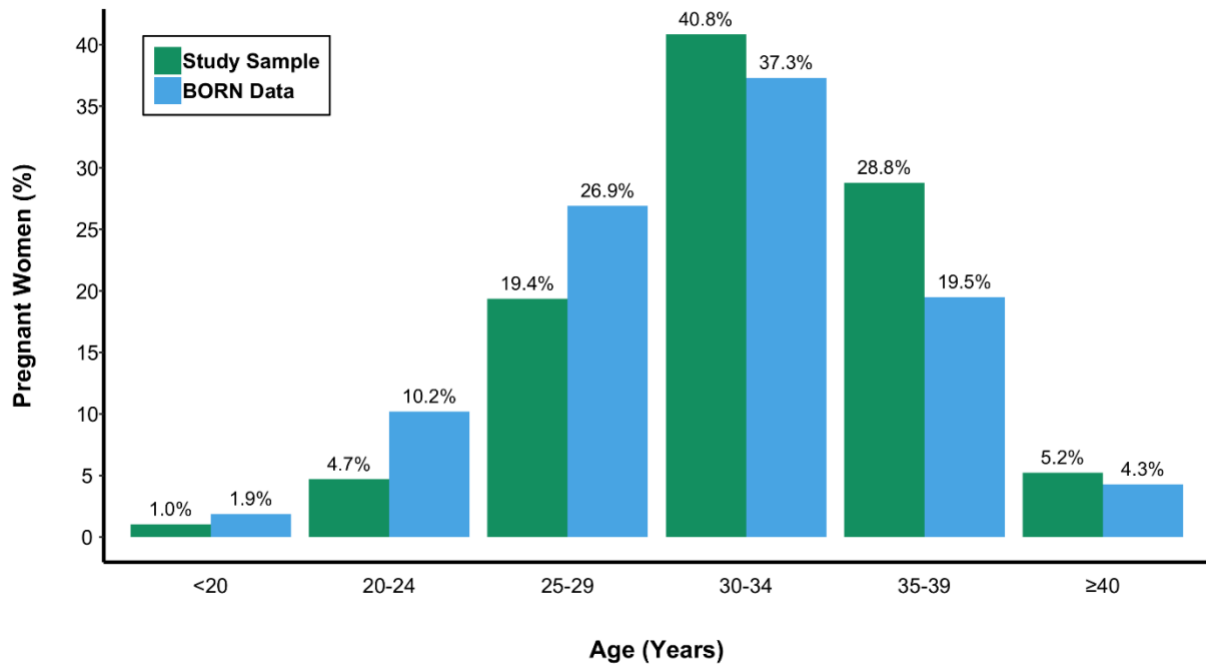

**Figure S1.** Age distribution of our study sample compared to the distribution of maternal age at birth in the Better Outcomes Registry and Network (BORN) from Ontario in 2016-2017.

1  
2  
3 424  
4  
5 425  
6  
7  
8 426  
9  
10 427  
11  
12 428  
13  
14 429  
15  
16 430  
17  
18  
19 431  
20  
21 432  
22  
23 433  
24  
25  
26 434  
27  
28 435  
29  
30  
31 436  
32  
33 437  
34  
35 438  
36  
37  
38 439  
39  
40 440  
41  
42 441  
43  
44  
45  
46  
47  
48  
49  
50  
51  
52  
53  
54  
55  
56  
57  
58  
59  
60

**Appendix S1.** Survey questions and response options.  
Sample “Yes” responses were entered to trigger additional questions about partner cannabis use and characteristics of current cannabis use.

Confidential

**Table 1.** Summary of sample cohort and outcomes.

| <b>Variable</b>                         | <b>All Women</b> | <b>Cannabis at Some Point in Pregnancy</b> | <b>Current Cannabis Use During Pregnancy</b> | <b>Intent to Use Cannabis While Breastfeeding*</b> |
|-----------------------------------------|------------------|--------------------------------------------|----------------------------------------------|----------------------------------------------------|
| <b>All Women</b>                        | 100 (478)        | 11.3% (54/478)                             | 4.2% (20/478)                                | 5% (23/460)                                        |
| <b>Education</b>                        |                  |                                            |                                              |                                                    |
| Elementary/High School                  | 18.8% (90/478)   | 30% (27/90)                                | 16% (14/90)                                  | 14% (12/83)                                        |
| College/Trade School                    | 35.6% (170/478)  | 10.6% (18/170)                             | 2.4% (4/170)                                 | 3.7% (6/164)                                       |
| University/Graduate School              | 45.6% (218/478)  | 4.1% (9/218)                               | 0.9% (2/218)                                 | 2.3% (5/213)                                       |
| <b>Income (CA\$)</b>                    |                  |                                            |                                              |                                                    |
| \$0-40,000                              | 19.7% (94/478)   | 27% (25/94)                                | 15% (14/94)                                  | 9% (8/88)                                          |
| \$41,000-100,000                        | 36.8% (176/478)  | 7.2% (15/208)                              | 1.0% (2/208)                                 | 3.5% (7/198)                                       |
| \$101,000+                              | 43.5% (208/478)  | 7.9% (14/176)                              | 2.3% (4/176)                                 | 4.6% (8/174)                                       |
| <b>Partner Cannabis Use<sup>†</sup></b> |                  |                                            |                                              |                                                    |
| Yes                                     | 37.4% (178/476)  | 20.2% (36/178)                             | 7.3% (13/178)                                | 8.9% (15/169)                                      |
| No                                      | 62.6% (298/476)  | 6.0% (18/298)                              | 2.3% (7/298)                                 | 2.8% (8/289)                                       |
| <b>Relationship Status<sup>‡</sup></b>  |                  |                                            |                                              |                                                    |
| Single/Dating                           | 8.4% (40/477)    | 18% (7/40)                                 | 10% (4/40)                                   | 9% (3/34)                                          |
| Married/Living Together                 | 91.6% (437/477)  | 10.8% (47/437)                             | 3.7% (16/437)                                | 4.7% (20/425)                                      |
| <b>Age<sup>§</sup> (years)</b>          | 32.3 ± 4.6       | 30.4 ± 6.0                                 | 31.1 ± 4.2                                   | 30.5 ± 5.3 <sup>  </sup>                           |

1  
2  
3 Data are % (n) or mean  $\pm$  SD.  
4

5 Percentages represent the proportion of women with the outcome for a given level of a  
6  
7 categorical variable (e.g. 30% of women with a high school education, n=27/90, used  
8  
9 cannabis during pregnancy).  
10

11 Means represent the mean age of women with the outcome (e.g. the mean age of  
12  
13 women that smoked cannabis during pregnancy was 30.4 $\pm$  6.0).  
14  
15

16  
17 \*Statistics in this column are calculated from the subset of respondents who intended to  
18  
19 breastfeed (those who did not intend to breastfeed were excluded from calculations).  
20

21 † Two observations removed due to missingness.  
22

23 ‡ One observation removed due to missingness.  
24

25 §Statistics are calculated from the n=191 participants who reported their age.  
26

27 ¶Statistics are calculated from the n=185 participants who reported their age and  
28  
29 intended to breastfeed.  
30  
31  
32  
33  
34  
35  
36  
37  
38  
39  
40  
41  
42  
43  
44  
45  
46  
47  
48  
49  
50  
51  
52  
53  
54  
55  
56  
57  
58  
59  
60

**Table 2.** Logistic regression model results.

| Characteristic               | Cannabis Use at Some Point in Pregnancy | Current Cannabis Use During Pregnancy | Intent to Use Cannabis While Breastfeeding |
|------------------------------|-----------------------------------------|---------------------------------------|--------------------------------------------|
|                              | OR (95% CI)                             | OR (95% CI)                           | OR (95% CI)                                |
| <b>Education</b>             |                                         |                                       |                                            |
| Elementary/High School       | 8.6 (3.8- 19.5)                         | 19.9 (4.4-89.5)                       | 5.9 (2.0-17.7)                             |
| College/Trade School         | 2.5 (1.1-5.8)                           | 2.6 (0.47-14.4)                       | 1.43 (0.4-4.8)                             |
| University/Graduate School   | Ref.                                    | Ref.                                  | Ref.                                       |
| <b>Partner Cannabis Use†</b> |                                         |                                       |                                            |
| Yes                          | 3.30 (1.8-6.2)                          | NS                                    | 2.8 (1.1-6.9)                              |
| No                           | Ref.                                    | NS                                    | Ref.                                       |

OR, odds ratio; CI, confidence interval; Ref., reference value; NS, not significant.

†Two observations removed due to missingness.

1  
2  
3  
4  
5  
6  
7  
8  
9  
10  
11  
12  
13  
14  
15  
16  
17  
18  
19  
20  
21  
22  
23  
24  
25  
26  
27  
28  
29  
30  
31  
32  
33  
34  
35  
36  
37  
38  
39  
40  
41  
42  
43  
44  
45  
46  
47  
48  
49  
50  
51  
52  
53  
54  
55  
56  
57  
58  
59  
60

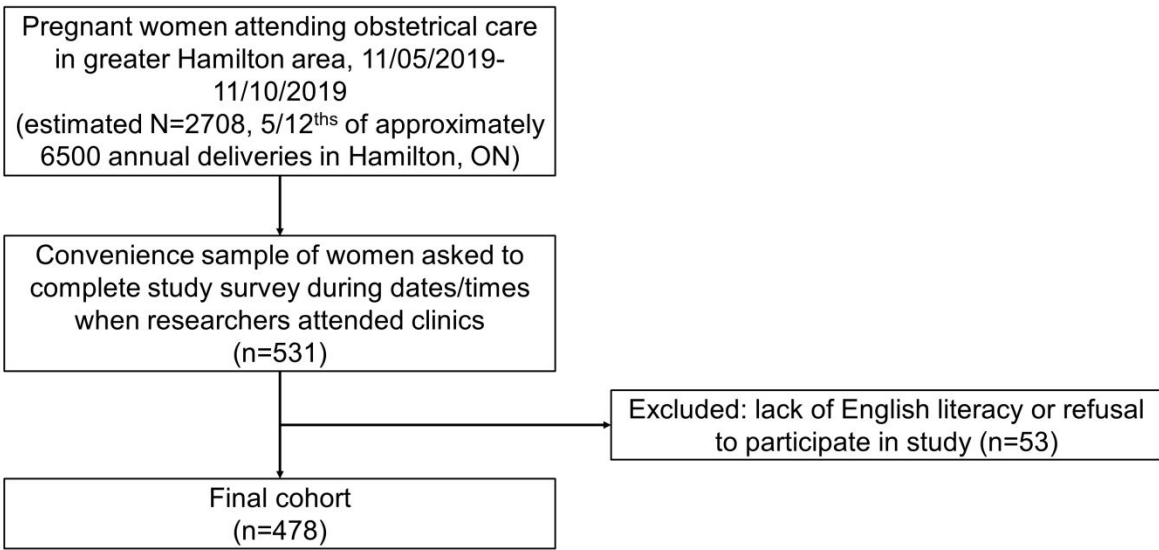

**Figure 1.** Description of participant accrual.

Confidential

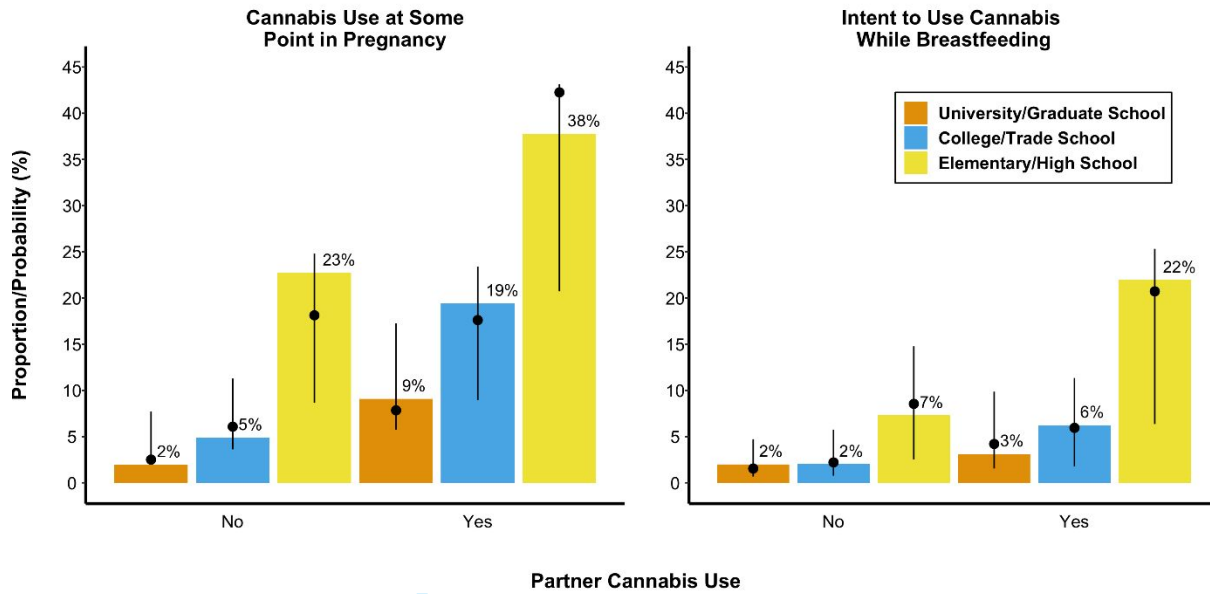

**Figure 2.** Predictors of cannabis use at some point in pregnancy and intent to use cannabis while breastfeeding. For each group of women, coloured bars represent the proportion of women who reported the outcome and dots represent the estimated probability of the outcome ( $\pm 95\%$  CI).

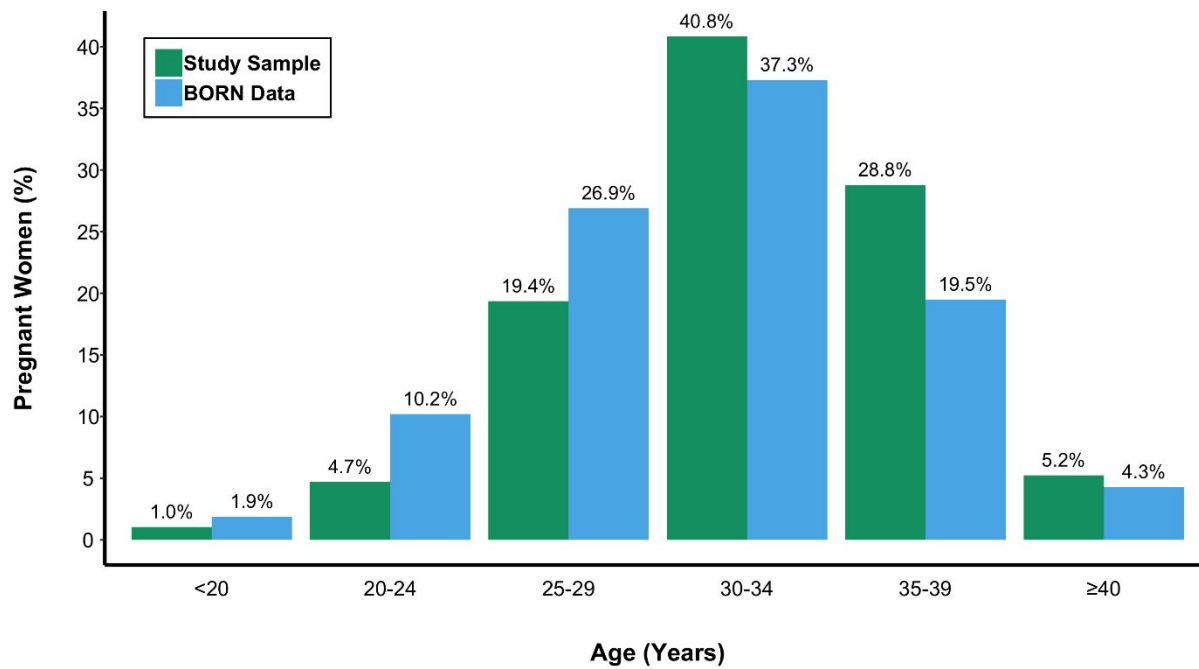

**Figure S1.** Age distribution of our study sample compared to the distribution of maternal age at birth in the Better Outcomes Registry and Network (BORN) from Ontario in 2016-2017.



Resize font:

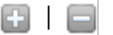

# Cannabis and Pregnancy

How old are you?

What is the highest level of education that you have completed?

- elementary/middle school
- high school
- trade schooling
- college
- university undergrad degree
- graduate/professional school

reset

What is your annual household income?

- under \$20,000
- \$20,000 - \$40,000
- \$41,000 - \$60,000
- \$61,000 - \$80,000
- \$81,000 - \$100,000
- over \$100,000

reset

What is your relationship status?

- single/divorced/widowed
- in a relationship but not living together
- married/common law/living together

reset

Have you *ever* smoked marijuana or used any cannabis products?

- Yes
- No

reset

Does your partner smoke marijuana or use cannabis products?

- Yes
- No

reset

Has your partner smoked marijuana around you during your pregnancy?

- Yes
- No

reset

1 **Have you smoked marijuana or used cannabis**  
2 **products at any point during this pregnancy?**  
3 **(including during the time before you knew you**  
4 **were pregnant)**

Yes

No

reset

7 **Are you currently smoking marijuana or using**  
8 **cannabis products?**

Yes

No

reset

13 **How do you use it? (check all that apply)**

smoking flower/joints

using a pipe or water bong

edibles

oils

vaporizing (vaping) with a device

24 **What type do you use?**

THC

CBD

combination

not sure

reset

34 **How often do you smoke marijuana or use**  
35 **cannabis product?**

occasionally (once a month or less)

a few times a month

once a week

2-3 times per week

4-6 times per week

daily

reset

46 **Please indicate the reason you find cannabis**  
47 **helpful (check all that apply)**

nausea and/or vomiting

pain

sleep

nerves/anxiety

social

other

1 **Do you think that you will smoke marijuana or**  
 2 **use cannabis products after giving birth, while**  
 3 **breastfeeding?**

- Yes  
 No  
 I don't plan to breastfeed

4  
5  
6  
7 reset

8 **Have you ever received information about**  
 9 **cannabis and pregnancy from a healthcare**  
 10 **professional?**

- Yes  
 No

11  
12 reset

13 **Do you think marijuana/cannabis can pass**  
 14 **through to the baby when you're pregnant?**

- Yes  
 No

15  
16  
17  
18 reset

19 **Do you think that marijuana/cannabis can be**  
 20 **transmitted to the baby through breast milk?**

- Yes  
 No

21  
22  
23  
24 reset

25 **Has your choice to use or not use cannabis during**  
 26 **pregnancy or breastfeeding been influenced by**  
 27 **the recent legalization?**

- Yes  
 No

28  
29  
30 reset

31 **Have you ever looked for information about how**  
 32 **cannabis can affect your pregnancy?**

- Yes  
 No

33  
34  
35  
36 reset

37 **If you wanted to find information on how**  
 38 **cannabis affects pregnancy, where would you**  
 39 **look?**

- from healthcare professionals  
 on the internet  
 from cannabis dispensaries/sellers  
 from pregnancy groups  
 from family/friends  
 other

40  
41  
42  
43  
44  
45  
46  
47  
48  
49  
50  
51  
52 << Previous Page

53  
54  
55  
56  
57 Submit

# Checklist for Reporting Results of Internet E-Surveys (CHERRIES)

| <i>Item Category / Checklist Item</i>                                                       | <i>Explanation</i>                                                                                                                                                                                                                                                                                                                                                                                                                            | <i>Location in paper</i>        |
|---------------------------------------------------------------------------------------------|-----------------------------------------------------------------------------------------------------------------------------------------------------------------------------------------------------------------------------------------------------------------------------------------------------------------------------------------------------------------------------------------------------------------------------------------------|---------------------------------|
| <b>Design</b>                                                                               |                                                                                                                                                                                                                                                                                                                                                                                                                                               |                                 |
| Describe survey design                                                                      | Describe target population, sample frame. Is the sample a convenience sample? (In "open" surveys this is most likely.)                                                                                                                                                                                                                                                                                                                        | Page 4, 6, Figure 1             |
| <b>IRB (Institutional Review Board) approval and informed consent process</b>               |                                                                                                                                                                                                                                                                                                                                                                                                                                               |                                 |
| IRB approval                                                                                | Mention whether the study has been approved by an IRB.                                                                                                                                                                                                                                                                                                                                                                                        | Page 7                          |
| Informed consent                                                                            | Describe the informed consent process. Where were the participants told the length of time of the survey, which data were stored and where and for how long, who the investigator was, and the purpose of the study?                                                                                                                                                                                                                          | Page 4                          |
| Data protection                                                                             | If any personal information was collected or stored, describe what mechanisms were used to protect unauthorized access.                                                                                                                                                                                                                                                                                                                       | Page 4                          |
| <b>Development and pre-testing</b>                                                          |                                                                                                                                                                                                                                                                                                                                                                                                                                               |                                 |
| Development and testing                                                                     | State how the survey was developed, including whether the usability and technical functionality of the electronic questionnaire had been tested before fielding the questionnaire.                                                                                                                                                                                                                                                            | Page 4                          |
| <b>Recruitment process and description of the sample having access to the questionnaire</b> |                                                                                                                                                                                                                                                                                                                                                                                                                                               |                                 |
| Open survey versus closed survey                                                            | An "open survey" is a survey open for each visitor of a site, while a closed survey is only open to a sample which the investigator knows (password-protected survey).                                                                                                                                                                                                                                                                        | Page 4                          |
| Contact mode                                                                                | Indicate whether or not the initial contact with the potential participants was made on the Internet. (Investigators may also send out questionnaires by mail and allow for Web-based data entry.)                                                                                                                                                                                                                                            | Page 4                          |
| Advertising the survey                                                                      | How/where was the survey announced or advertised? Some examples are offline media (newspapers), or online (mailing lists – If yes, which ones?) or banner ads (Where were these banner ads posted and what did they look like?). It is important to know the wording of the announcement as it will heavily influence who chooses to participate. Ideally the survey announcement should be published as an appendix.                         | N/A<br>Not advertised<br>Page 4 |
| <b>Survey administration</b>                                                                |                                                                                                                                                                                                                                                                                                                                                                                                                                               |                                 |
| Web/E-mail                                                                                  | State the type of e-survey (eg, one posted on a Web site, or one sent out through e-mail). If it is an e-mail survey, were the responses entered manually into a database, or was there an automatic method for capturing responses?                                                                                                                                                                                                          | Page 4                          |
| Context                                                                                     | Describe the Web site (for mailing list/newsgroup) in which the survey was posted. What is the Web site about, who is visiting it, what are visitors normally looking for? Discuss to what degree the content of the Web site could pre-select the sample or influence the results. For example, a survey about vaccination on an anti-immunization Web site will have different results from a Web survey conducted on a government Web site | N/A                             |
| Mandatory/voluntary                                                                         | Was it a mandatory survey to be filled in by every visitor who wanted to enter the Web site, or was it a voluntary survey?                                                                                                                                                                                                                                                                                                                    | no                              |
| Incentives                                                                                  | Were any incentives offered (eg, monetary, prizes, or non-monetary incentives such as an offer to provide the survey results)?                                                                                                                                                                                                                                                                                                                | no                              |
| Time/Date                                                                                   | In what timeframe were the data collected?                                                                                                                                                                                                                                                                                                                                                                                                    | Page 4                          |

| <i>Item Category / Checklist Item</i>                                                                     | <i>Explanation</i>                                                                                                                                                                                                                                                                                                                                                                                                                                                                                                             | <i>Location in paper</i>         |
|-----------------------------------------------------------------------------------------------------------|--------------------------------------------------------------------------------------------------------------------------------------------------------------------------------------------------------------------------------------------------------------------------------------------------------------------------------------------------------------------------------------------------------------------------------------------------------------------------------------------------------------------------------|----------------------------------|
| Randomization of items or questionnaires                                                                  | To prevent biases items can be randomized or alternated.                                                                                                                                                                                                                                                                                                                                                                                                                                                                       | N/A                              |
| Adaptive questioning                                                                                      | Use adaptive questioning (certain items, or only conditionally displayed based on responses to other items) to reduce number and complexity of the questions.                                                                                                                                                                                                                                                                                                                                                                  | Page 4                           |
| Number of Items                                                                                           | What was the number of questionnaire items per page? The number of items is an important factor for the completion rate.                                                                                                                                                                                                                                                                                                                                                                                                       | One page only<br>Appendix S1     |
| Number of screens (pages)                                                                                 | Over how many pages was the questionnaire distributed? The number of items is an important factor for the completion rate.                                                                                                                                                                                                                                                                                                                                                                                                     | One page only<br>Appendix S1     |
| Completeness check                                                                                        | It is technically possible to do consistency or completeness checks before the questionnaire is submitted. Was this done, and if “yes”, how (usually JavaScript)? An alternative is to check for completeness after the questionnaire has been submitted (and highlight mandatory items). If this has been done, it should be reported. All items should provide a non-response option such as “not applicable” or “rather not say”, and selection of one response option should be enforced.                                  | No was not done                  |
| Review step                                                                                               | State whether respondents were able to review and change their answers (eg, through a Back button or a Review step which displays a summary of the responses and asks the respondents if they are correct).                                                                                                                                                                                                                                                                                                                    | No, one page only<br>Appendix S1 |
| <b>Response rates</b>                                                                                     |                                                                                                                                                                                                                                                                                                                                                                                                                                                                                                                                |                                  |
| Unique site visitor                                                                                       | If you provide view rates or participation rates, you need to define how you determined a unique visitor. There are different techniques available, based on IP addresses or cookies or both.                                                                                                                                                                                                                                                                                                                                  | N/A                              |
| View rate (Ratio of unique survey visitors/unique site visitors)                                          | Requires counting unique visitors to the first page of the survey, divided by the number of unique site visitors (not page views!). It is not unusual to have view rates of less than 0.1 % if the survey is voluntary.                                                                                                                                                                                                                                                                                                        | N/A                              |
| Participation rate (Ratio of unique visitors who agreed to participate/unique first survey page visitors) | Count the unique number of people who filled in the first survey page (or agreed to participate, for example by checking a checkbox), divided by visitors who visit the first page of the survey (or the informed consents page, if present). This can also be called “recruitment” rate.                                                                                                                                                                                                                                      | N/A                              |
| Completion rate (Ratio of users who finished the survey/users who agreed to participate)                  | The number of people submitting the last questionnaire page, divided by the number of people who agreed to participate (or submitted the first survey page). This is only relevant if there is a separate “informed consent” page or if the survey goes over several pages. This is a measure for attrition. Note that “completion” can involve leaving questionnaire items blank. This is not a measure for how completely questionnaires were filled in. (If you need a measure for this, use the word “completeness rate”.) | N/A                              |
| <b>Preventing multiple entries from the same individual</b>                                               |                                                                                                                                                                                                                                                                                                                                                                                                                                                                                                                                |                                  |
| Cookies used                                                                                              | Indicate whether cookies were used to assign a unique user identifier to each client computer. If so, mention the page on which the cookie was set and read, and how long the cookie was valid. Were duplicate entries avoided by preventing users access to the survey twice; or were duplicate database entries having the same user ID eliminated before analysis? In the latter case, which entries were kept for analysis (eg, the first entry or the most recent)?                                                       | N/A                              |
| IP check                                                                                                  | Indicate whether the IP address of the client computer was used to identify potential duplicate entries from the same user. If so, mention the period of time for which no two entries from the same IP address                                                                                                                                                                                                                                                                                                                | N/A                              |

| <i>Item Category / Checklist Item</i>               | <i>Explanation</i>                                                                                                                                                                                                                                                                                                                                                                                                                | <i>Location in paper</i> |
|-----------------------------------------------------|-----------------------------------------------------------------------------------------------------------------------------------------------------------------------------------------------------------------------------------------------------------------------------------------------------------------------------------------------------------------------------------------------------------------------------------|--------------------------|
|                                                     | were allowed (eg, 24 hours). Were duplicate entries avoided by preventing users with the same IP address access to the survey twice; or were duplicate database entries having the same IP address within a given period of time eliminated before analysis? If the latter, which entries were kept for analysis (eg, the first entry or the most recent)?                                                                        |                          |
| Log file analysis                                   | Indicate whether other techniques to analyze the log file for identification of multiple entries were used. If so, please describe.                                                                                                                                                                                                                                                                                               | N/A                      |
| Registration                                        | In “closed” (non-open) surveys, users need to login first and it is easier to prevent duplicate entries from the same user. Describe how this was done. For example, was the survey never displayed a second time once the user had filled it in, or was the username stored together with the survey results and later eliminated? If the latter, which entries were kept for analysis (eg, the first entry or the most recent)? | N/A                      |
| <b>Analysis</b>                                     |                                                                                                                                                                                                                                                                                                                                                                                                                                   |                          |
| Handling of incomplete questionnaires               | Were only completed questionnaires analyzed? Were questionnaires which terminated early (where, for example, users did not go through all questionnaire pages) also analyzed?                                                                                                                                                                                                                                                     | N/A                      |
| Questionnaires submitted with an atypical timestamp | Some investigators may measure the time people needed to fill in a questionnaire and exclude questionnaires that were submitted too soon. Specify the timeframe that was used as a cut-off point, and describe how this point was determined.                                                                                                                                                                                     | Not done                 |
| Statistical correction                              | Indicate whether any methods such as weighting of items or propensity scores have been used to adjust for the non-representative sample; if so, please describe the methods.                                                                                                                                                                                                                                                      | N/A                      |
